# Supplementary material
Source: Royal Society of Chemistry journal article supplement (doi:10.1039/d6me00045b)
Supplement: d6me00045b1.pdf [file d6me00045b1.pdf]

1  
2  
3  
4  
5  
6  
7  
8  
9  
10  
11  
12  
13

## SUPPORTING INFORMATION

### **Zinc–Phenolic Coordination-Driven Gelatin Hydrogel Networks with Enhanced Biological Properties for Tissue Regeneration**

Ngoc Anh Phung Thi <sup>a</sup>, Nhat Hung Pham Ba <sup>b</sup>, Long Binh Vong <sup>b</sup>, Dong Yen Pham  
Nguyen <sup>a</sup>, Thanh Thuy Nguyen Thi <sup>a</sup>, Tien Dung Nguyen Dinh <sup>a</sup>, Huynh Nhu Mai <sup>c</sup>,  
Ngoc Trinh Huynh <sup>c</sup>, Dieu Linh Tran <sup>a,\*</sup>, and Dai Hai Nguyen <sup>a,\*</sup>

<sup>a</sup> *Institute of Advanced Technology, Vietnam Academy of Science and Technology, 1B  
TL29 Street, An Phu Dong Ward, Ho Chi Minh City 700000, Vietnam*

<sup>b</sup> *International University – Vietnam National University HCM City, VNU-HCM Urban  
Area, Quarter 33, Linh Xuan Ward, Ho Chi Minh City 700000, Vietnam*

<sup>c</sup> *University of Medicine and Pharmacy at Ho Chi Minh city, 217 Hong Bang Street,  
Cho Lon Ward, Ho Chi Minh City 700000, Vietnam*

Day 0

Day 3

Day 3 – Hydrogel re-inject

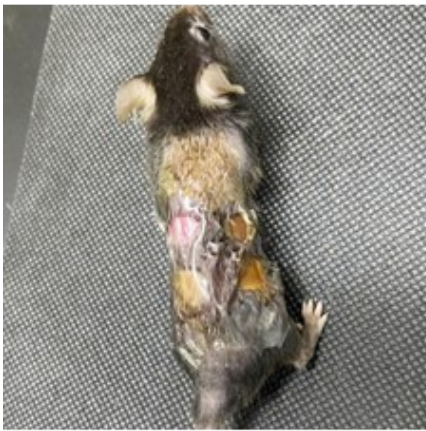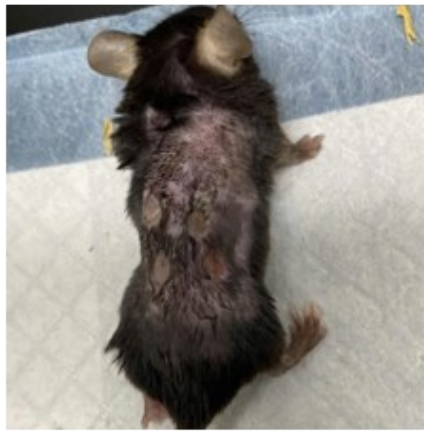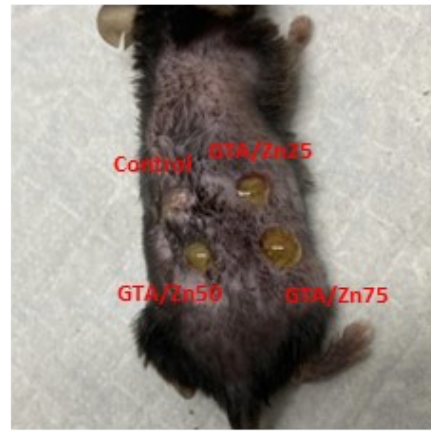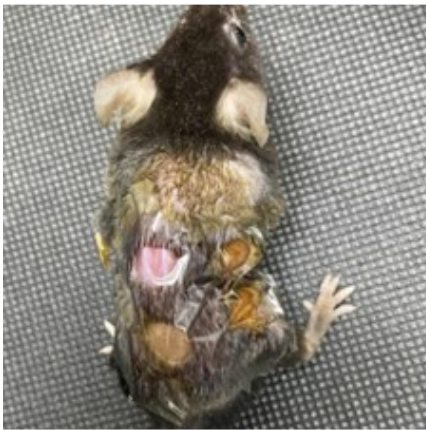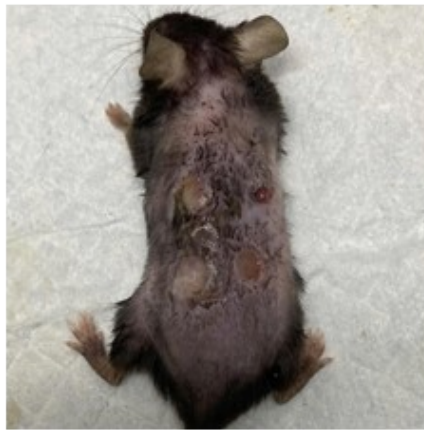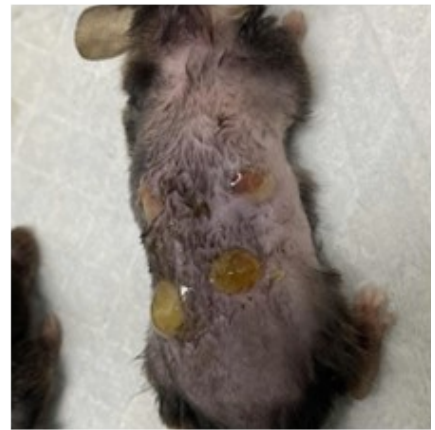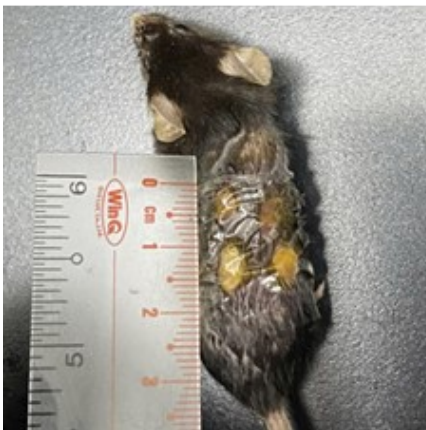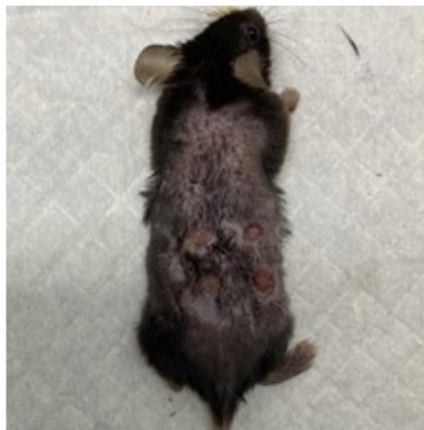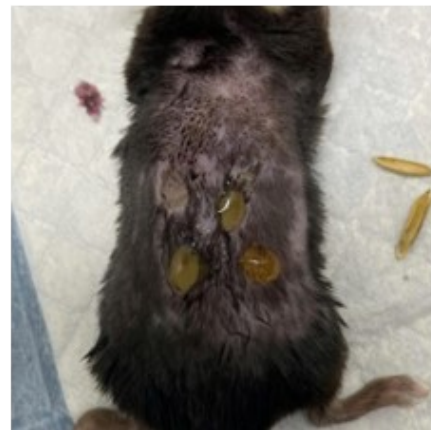

14

15 Figure S1. Images of the skin wound on rat model at D0 and D3.
